# Supplementary material for: Microwave catalytic activities of MFe2O4@CMT (M = Ni, Co) supported catalysts for the degradation of dimethyl phthalate
Source: Royal Society of Chemistry journal article supplement (doi:10.1039/d2va00019a), 2022-01-01
Supplement: d2va00019a1.pdf [file d2va00019a1.pdf]

# 1 Microwave catalytic activities of supported catalysts $\text{MFe}_2\text{O}_4@\text{CMT}$ 2 ( $\text{M}=\text{Ni}, \text{Co}$ ) for dimethyl phthalate degradation

3 Wenli Qin<sup>a</sup>, Xinyi Zhang<sup>a</sup>, Zefei Chen<sup>a</sup>, Xueya Liu<sup>a</sup>, Manqing Ai<sup>b</sup>, Pingping Zhang<sup>b</sup>,  
4 Ying Ye<sup>b</sup>, Zengling Ma<sup>a1</sup>

5 <sup>a</sup> National and Local Joint Engineering Research Center of Ecological Treatment  
6 Technology for Urban Water Pollution, College of Life and Environmental Science,  
7 Wenzhou University, Wenzhou, 325035, P.R. China

8 <sup>b</sup> Ocean College, Zhejiang University, Zhoushan, 316021, P.R. China

## 9 1. Materials information

10 Table S1 The content of the main elements in simulated seawater

| Elements                      | $\text{Cl}^-$ | $\text{Na}^+$ | $\text{Mg}^{2+}$ | $\text{SO}_4^{2-}$ | $\text{Ca}^{2+}$ | $\text{K}^+$ | $\text{Br}^-$ | others |
|-------------------------------|---------------|---------------|------------------|--------------------|------------------|--------------|---------------|--------|
| Content ( $\text{g L}^{-1}$ ) | 18.30         | 9.78          | 1.08             | 2.46               | 0.35             | 0.31         | 0.042         | 0.23   |

## 11 2. Pore structure analysis

12 Table S2 BET surface area and pore characteristics of PCCF and PCNF

| Sample | Surface are ( $\text{m}^2 \text{g}^{-1}$ ) | Mesopore volume ( $\text{cm}^3 \text{g}^{-1}$ ) | Micropore volume ( $\text{cm}^3 \text{g}^{-1}$ ) | Average pore size (nm) |
|--------|--------------------------------------------|-------------------------------------------------|--------------------------------------------------|------------------------|
| PCCF   | 8.995                                      | 0.231                                           | 0.058                                            | 8.36                   |
| PCNF   | 11.22                                      | 0.256                                           | 0.067                                            | 7.12                   |

## 13 3. Permittivity and Permeability

14 The frequency dependence of EM parameters of ferrite/corn cob composite were  
15 detected using vector network analyzer in the range of 1-18 GHz. As shown in Fig.

<sup>1</sup> Corresponding author: Zengling Ma, Email: mazengling@wzu.edu.cn; Tel.: +86-0577-86689079; fax: +86-0577-86689079.

16 S1a and S1b, the real ( $\epsilon'$ ) and imaginary permittivities ( $\epsilon''$ ) of CC were 22.74 - 206.14  
 17 and 63.25 - 194.33, respectively. The  $\epsilon'$  and  $\epsilon''$  kept decreasing with the increasing of  
 18 frequency. Consequently, their dielectric loss tangents ( $\tan \delta_e = \epsilon''/\epsilon'$ , Fig. S1c) were  
 19 generally invariant at 0.94 to 2.74. When coated with ferrite, the  $\epsilon'$  were between 3.33  
 20 and 3.73 of PCCF, 3.62 and 3.83 of PCNF, which were smaller than that of CC; the  $\epsilon''$   
 21 of PCCF and PCNF fluctuated slightly with frequencies between 0.06 and 1.24. It is  
 22 well known that  $\epsilon'' \approx \sigma/2\pi\epsilon_0 f$  according to the free electron theory (Chen *et al.* 2012a),  
 23 where  $\sigma$  is the conductivity of the sample; that is, higher  $\epsilon''$  values require higher  
 24 conductivities. The  $\epsilon''$  values of ferrite/corn cob composite are almost increased  
 25 slightly with frequency, indicating that the poorer conductivity of ferrite/corn cob  
 26 composite than that of CC. Consequently, the  $\tan \delta_e$  value of ferrite/corn cob  
 27 composite increased to the maximum value at 2.74 of CC, 0.26 of PCCF, 0.10 of  
 28 PCNF, where larger  $\tan \delta_e$  values show higher dielectric loss. It is indicated that the  
 29 coating of ferrite/corn cob will not increase the conductivity of the sample, resulted in  
 30 PCCF and PCNF showed lower permittivity than CC.

31 Fig. S1d and S1e showed the frequency dependence of the relative complex  
 32 permeability of ferrite/corn cob composite. Because of the absence of magnetic  
 33 components, the real ( $\mu'$ ) and imaginary permeability ( $\mu''$ ) of CC were lower than that  
 34 of PCCF and PCNF. Nevertheless, the  $\mu'$  and  $\mu''$  values of PCCF showed slightly  
 35 higher than PCNF exhibited highest value, the maximum  $\mu'$  and  $\mu''$  value were 1.57  
 36 and 0.91, respectively. As a result, the magnetic loss tangent ( $\tan \delta_m = \mu''/\mu'$ , Fig. S1f)  
 37 of CC and PCNF were below 0.030, while the maximum magnetic loss tangent of

38 PCCF was 1.07. The complex permittivity and permeability values of ferrite/corncob  
 39 composite suggest that the presence of ferrite will enhance the EM wave absorption,  
 40 mainly induced by magnetic loss.

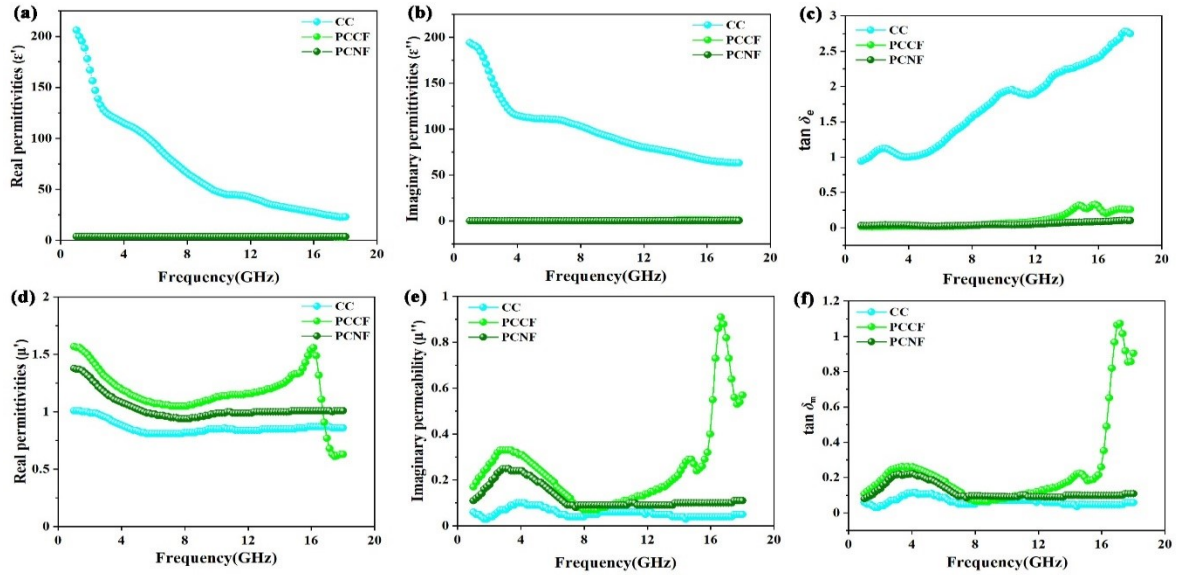

41  
 42  
 43 Fig. S1 Frequency dependence of (a) real permittivity, (b) imaginary permittivity, (c) dielectric loss tangent,  
 44 (d) real permeability, (e) imaginary permeability, and (f) magnetic loss tangent of CC, PCCF, and PCNF  
 45 with volume fraction of 50 % and thickness of 2 mm.

46 Table S3 The comparison between the different EM wave absorbing materials

|                                                                         | Thickness (mm) | Maximum RL (dB) |
|-------------------------------------------------------------------------|----------------|-----------------|
| CC                                                                      | 2.72           | -1.82           |
| PCCF                                                                    | 1.82           | -39.79          |
| PCNF                                                                    | 6.47           | -23.47          |
| Porous Carbon fiber (Guan <i>et al.</i> , 2007)                         | 2.9            | -15.5           |
| Porous Fe (Chen <i>et al.</i> , 2012b)                                  | 2.0            | -21.9           |
| Rice Husk Ash (Liu <i>et al.</i> 2014)                                  | 2.0            | -12.5           |
| Halloysite-Fe (Zhang <i>et al.</i> , 2014)                              | 2.0            | -0.8            |
| Polypropylene/montmorillonite/polypyrrole (Moučka <i>et al.</i> , 2011) | 100            | -60.0           |

#### 47 4. Degradation

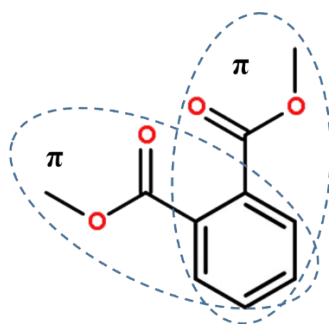

Fig. S2 Chemical structure of DMP

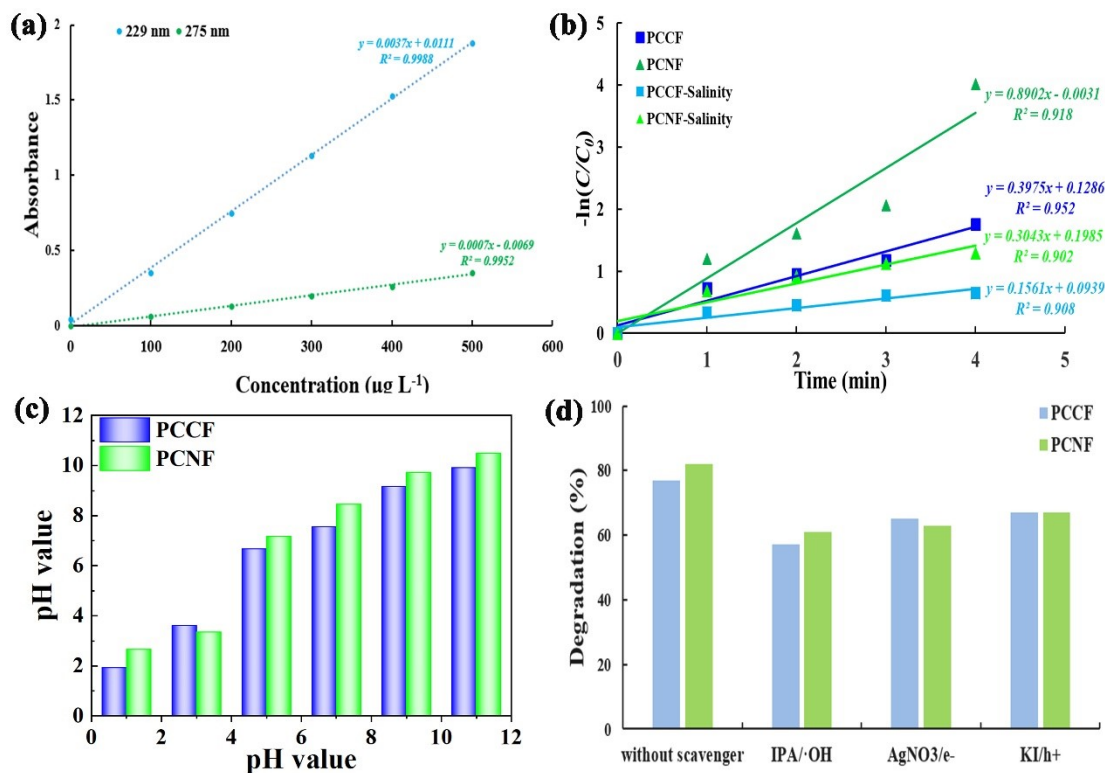

Fig. S3 (a) Standard curve of absorption peak of phenyl ester and benzene ring at 229 nm and 275 nm in the UV-Vis spectrum; (b) Kinetics studies of MW-induced degradation of DMP; (c) pH values of DMP solution after PCCF and PCNF microwave enhanced Fenton-like performance; (d) MW enhanced Fenton-like performance of PCCF and PCNF when hydroxyl radical quenching agent added after 1 min MW

Table S4 DMP degradation first-order kinetic reaction fitting kinetic constant

| Catalyst         | $k$ ( $\text{min}^{-1}$ ) |
|------------------|---------------------------|
| PCCF             | 0.3975                    |
| PCNF             | 0.8902                    |
| PCCF in salinity | 0.1561                    |

57

58

Table S5 Experimental details and the DMP removal rate of AOPs systems

| Catalyst                                                                   | Type of reaction                                                                    | Catalyst dosage       | DMP concentration (mg L <sup>-1</sup> ) | Time (min) | Degradation rate (%) | Reference                 |
|----------------------------------------------------------------------------|-------------------------------------------------------------------------------------|-----------------------|-----------------------------------------|------------|----------------------|---------------------------|
| Hydroxylamine sulfate                                                      | Electro-Fenton (Fe <sup>2+</sup> : 10 mM)                                           | 0.5 µM                | 10                                      | 20         | 96.7                 | Li, <i>et al.</i> , 2022  |
| Graphene-WO <sub>3</sub>                                                   | Dielectric barrier discharge plasma system                                          | 40 mg L <sup>-1</sup> | 10                                      | 60         | 90.60                | Han, <i>et al.</i> , 2022 |
| Z-scheme iron oxide/mpg-C <sub>3</sub> N <sub>4</sub> /BiOBr/polythiophene | Photocatalytic                                                                      | 1.0 g L <sup>-1</sup> | 20                                      | 360        | 92                   | Li, <i>et al.</i> , 2021  |
| CoFe <sub>2</sub> O <sub>4</sub> @CMT                                      | Microwave-assisted Fenton (H <sub>2</sub> O <sub>2</sub> : 200 mg L <sup>-1</sup> ) | 2.0 g L <sup>-1</sup> | 500 µg L <sup>-1</sup>                  | 6          | 90                   | This paper                |
| NiFe <sub>2</sub> O <sub>4</sub> @CMT                                      | Microwave-assisted Fenton (H <sub>2</sub> O <sub>2</sub> : 200 mg L <sup>-1</sup> ) | 2.0 g L <sup>-1</sup> | 500 µg L <sup>-1</sup>                  | 6          | 99                   | This paper                |

59

Table S6 Information on intermediates

| Compound | Structure                                                                           | Formula                                        | m/z |
|----------|-------------------------------------------------------------------------------------|------------------------------------------------|-----|
| DMP      | 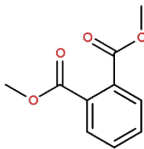 | C <sub>10</sub> H <sub>12</sub> O <sub>4</sub> | 196 |
| M1       | 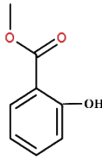 | C <sub>8</sub> H <sub>10</sub> O <sub>3</sub>  | 154 |
| M2       | 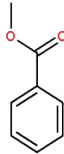 | C <sub>8</sub> H <sub>8</sub> O <sub>2</sub>   | 137 |
| M3       | 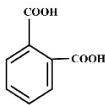 | C <sub>8</sub> H <sub>6</sub> O <sub>4</sub>   | 168 |

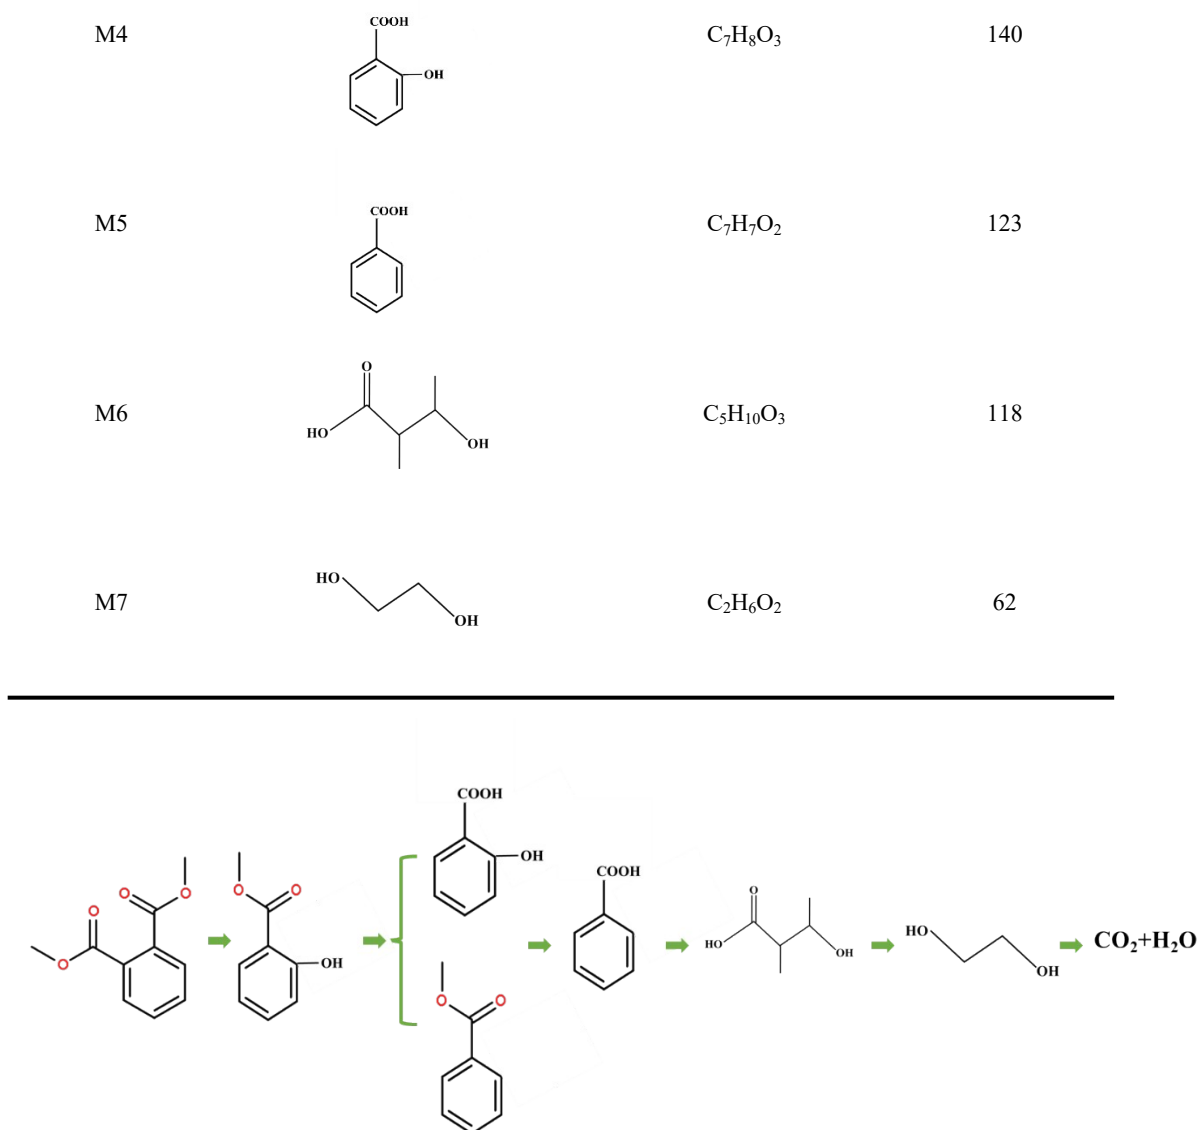

Fig. S4 The degradation pathway of DMP

#### 4. XPS after reaction

Table S7 Surface elemental and group composition (%) of PCCF and PCNF before and after reaction.

| Catalyst |        | C 1s    |       |                  | O 1s  |       |
|----------|--------|---------|-------|------------------|-------|-------|
|          |        | C-C/C=C | C-OH  | H <sub>2</sub> O | -OH   | Fe-O  |
| PCCF     | Before | 84.12   | 15.88 | 15.82            | 43.87 | 40.31 |
|          | After  | 81.74   | 18.26 | 3.29             | 51.02 | 45.69 |
| PCNF     | Before | 82.36   | 17.64 | 14.32            | 47.36 | 38.32 |

After 78.22 21.78 1.85 54.84 43.31

65

#### 66 4. Health risk evaluation

67 The non-carcinogenic risk (HI) is which is calculated according to Eqs. S1-S4.

$$68 \quad HI = \frac{CDI}{RfD} \quad (S1)$$

$$69 \quad CDI_{drinking} = \frac{C \times U \times EF \times ED}{BW \times AT}$$

70 (S2)

$$71 \quad CDI_{skin} = \frac{I \times A_{sd} \times FE \times ED}{BW \times AT \times f}$$

72 (S3)

$$73 \quad I = 2 \times 10^{-3} \times k \times C \times (6 \times \tau \times TE/\pi)^{0.5} \quad (S4)$$

74 The meaning, reference value, and unit of each symbol in the formula was shown  
75 in Table S9.

76 When the HI value is less than 1, it indicates that the exposure dose does not  
77 cause non-carcinogenic risk to human body. An HI value greater than 1 indicates a  
78 non-carcinogenic health risk to humans.

79 Table S8 PAEs concentrations in surface water of rivers and lakes in some places in China and  
80 overseas

| Site                                | DMP         | DEP        | DiBP      | DBP       | BBP  | DEHP       | DOP  | Reference                              |
|-------------------------------------|-------------|------------|-----------|-----------|------|------------|------|----------------------------------------|
| Somme River Water, France           | 0.02~0.25   | 0.26~6.98  | /         | 0.22~3.86 | ND   | 5.16~20.8  | ND   | Net, <i>et al.</i> , 2014              |
| Kaveri River, India                 | 0.02        | 0.24       | /         | 0.25      | 0.04 | 0.51       | 0.03 | Selvaraj, <i>et al.</i> , 2015         |
| False Creek Harbor, Spain           | <0.5        | <0.5       | /         | <0.5      | <0.5 | <0.5       | <0.5 | Mackintosh, <i>et al.</i> , 2009       |
| Manzanares and Halama rivers, Spain | ND          | ND         | /         | 0.25~1.76 | ND   | ND         | /    | Dominguez-Morueco <i>et al.</i> , 2014 |
| Xuanwu Lake, China                  | 0.003~0.085 | 0.015~0.32 | 0.16~0.92 | 0.94~3.60 | ND   | 0.087~0.63 | ND   | Zeng, <i>et al.</i> , 2008             |

81 Notes: 1) ND: not detected; 2) /: not determined.

82 Table S9 Meaning, reference value, and unit of each symbol in the formula

|                       | Meaning                                 | Reference value                                                 | Unit                                     |
|-----------------------|-----------------------------------------|-----------------------------------------------------------------|------------------------------------------|
| <i>CDI</i>            | Long-term daily intake                  | -                                                               | mg·(kg·d) <sup>-1</sup>                  |
| <i>RfD</i>            | Reference value                         | -                                                               | mg·(kg·d) <sup>-1</sup>                  |
| <i>SF</i>             | Slope factor of carcinogenic pollutants | -                                                               | (kg·d)·mg <sup>-1</sup>                  |
| <i>C</i>              | Contaminant concentration               | -                                                               | mg·L <sup>-1</sup>                       |
| <i>U</i>              | Daily drinking water quantity           | 1.825 (Male)<br>1.350 (Female)<br>1.000 (Children)              | L·d <sup>-1</sup>                        |
| <i>EF</i>             | Exposed frequency                       | 365<br>74 (Male)                                                | d·a <sup>-1</sup>                        |
| <i>ED</i>             | Exposed duration                        | 78 (Female)<br>12 (Children)                                    | a                                        |
| <i>BW</i>             | Average weight                          | 64.8 (Male)<br>55.1 (Female)<br>26.8 (Children)<br>27010 (Male) | kg                                       |
| <i>AT</i>             | Average exposed time                    | 28470 (Female)<br>4380 (Children)                               | d                                        |
| <i>I</i>              | Amount of contaminants absorbed by skin | -<br>17000 (Male)                                               | mg·cm <sup>-2</sup> ·times <sup>-1</sup> |
| <i>A<sub>sd</sub></i> | Surface area of the human body          | 15000 (Female)<br>8490 (Children)                               | cm <sup>2</sup>                          |
| <i>FE</i>             | Bathing frequency                       | 0.3                                                             | times·d <sup>-1</sup>                    |
| <i>TE</i>             | Bath time                               | 0.4                                                             | h                                        |
| <i>f</i>              | Intestinal adsorption ratio             | 1                                                               | -                                        |

|        |                           |       |                                               |
|--------|---------------------------|-------|-----------------------------------------------|
| $k$    | Skin adsorption parameter | 0.001 | $\text{cm}\cdot\text{h}^{-1}$                 |
| $\tau$ | Contaminant lag time      | 1     | h                                             |
| $RfD$  | Reference dose            | 0.1   | $\text{mg}\cdot(\text{kg}\cdot\text{d})^{-1}$ |

---

## 83 Reference:

- 84 Chen, X, Lv, S, Zhang, P, Cheng, J, Liu, S, Ye, Y, 2012a. Fabrication and electromagnetic  
85 performance of micro-tubular nanocomposites composed of monodisperse iron nanoparticles and  
86 carbon. *Journal of Magnetism and Magnetic Materials*, 324(9):1745-1751.
- 87 Chen, X, Cheng, J, Lv, S, Zhang, P, Liu, S, Ye, Y, 2012b. Preparation of porous magnetic  
88 nanocomposites using corncob powders as template and their applications for electromagnetic  
89 wave absorption. *Composites Science and Technology*, 72(8):908-914.
- 90 Dominguez-Morueco, N, Gonzalez-Alonso, S, Valcarcel, Y. 2014. Phthalate occurrence in rivers  
91 and tap water from central Spain. *Science of the Total Environment*, 500-501: 139-146.
- 92 Han, S, Mao, D, Wang, H, Guo, H, 2022. An insightful analysis of dimethyl phthalate degradation  
93 by the collaborative process of DBD plasma and Graphene- $\text{WO}_3$  nanocomposites. *Chemosphere*,  
94 291, 132774.
- 95 Guan, H, Liu, S, Duan, Y, Zhao, Y, 2007. Investigation of the electromagnetic characteristics of  
96 cement based composites filled with EPS. *Cement and Concrete Composites*, 29(1):49-54.
- 97 Li, S X, Lai, C, Li, C G, Zhong, J T, He, Z F, Peng, Q Y, Liu, X, Ke, B H, 2021. Enhanced  
98 photocatalytic degradation of dimethyl phthalate by magnetic dual Z-scheme iron oxide/mpg-  
99  $\text{C}_3\text{N}_4/\text{BiOBr}$ /polythiophene heterostructure photocatalyst under visible light. *Journal of Molecular*  
100 *Liquid*, 342, 116947.
- 101 Li, D, Yu, J H, Jia, J L, He, H Y, Shi, W, Zheng, T, Ma, J, 2022. Coupling electrode aeration and  
102 hydroxylamine for the enhanced Electro-Fenton degradation of organic contaminant: Improving  
103  $\text{H}_2\text{O}_2$  generation,  $\text{Fe}^{3+}/\text{Fe}^{2+}$  cycle and  $\text{N}_2$  selectivity. *Water Research*, 214: 118167.
- 104 Liu, S T, Chen, X G, Zhang, A B, Yan, K K, Ye, Y, 2014. Electromagnetic Performance of Rice  
105 Husk Ash. *Bioresources*, 9(2):2328-2340.
- 106 Mackintosh, CE, Maldonado, JA, Ikonomidou, MG, Gobas, FAPC. 2006. Sorption of phthalate  
107 esters and PCBs in a marine ecosystem. *Environmental Science & Technology*, 40(11): 3481-3488.
- 108 Moučka, R, Mravčáková, M, Vilčáková, J, Omastová, M, Sába, P, 2011. Electromagnetic

109 absorption efficiency of polypropylene/montmorillonite/polypyrrole nanocomposites. *Materials &*  
110 *Design*, 32(4):2006-2011.

111 Net, S, Dumoulin, D, El-Osmani, R, Rabodonirina, S, Ouddane, B. 2014. Case Study of PAHs,  
112 Me-PAHs, PCBs, Phthalates and Pesticides Contamination in the Somme River Water, France.  
113 *International Journal of Environmental Research*, 8(4): 1159-1170.

114 Selvaraj, KK, Sundaramoorthy, G, Ravichandran, PK, Girijan, GK, Sampath, S, Ramaswamy, BR.  
115 2015. Phthalate esters in water and sediments of the Kaveri River, India: environmental levels and  
116 ecotoxicological evaluations. *Environmental Geochemistry and Health*, 37: (1): 83-96.

117 Shen, Y, Xu, Q, Yin, X, Wang, M, Zhang, N, Wu, S, Zhang, Z, Gu, Z, Wang, H. 2010.  
118 Determination and Distribution Features of Phthalate Esters in Xuanwu Lake. *Journal of Southeast*  
119 *University (Natural Science Edition)*, 40 (6): 1337-1 341. (in Chinese)

120 Zeng, F, Cui, KY, Xie, ZY, Liu, M, Li, YJ, Lin, YJ, Zeng, ZX, Li, FB. 2008. Occurrence of  
121 phthalate esters in water and sediment of urban lakes in a subtropical city, Guangzhou, South  
122 China. *Environment International*, 34(3): 372-380.

123 Zhang, A., Liu, S., Yan, K., Ye, Y., Chen, X. 2014. Facile preparation of MnFe<sub>2</sub>O<sub>4</sub>/halloysite  
124 nanotubular encapsulates with enhanced magnetic and electromagnetic performances. *RSC*  
125 *Advances*, 4, 13565.
